## Review Article

# Using cryo-EM to uncover mechanisms of bacterial transcriptional regulation

David M. Wood<sup>1</sup>,  Renwick C.J. Dobson<sup>1,2</sup> and  Christopher R. Horne<sup>3,4</sup>

<sup>1</sup>Biomolecular Interaction Centre and School of Biological Sciences, University of Canterbury, Christchurch, New Zealand; <sup>2</sup>Bio21 Molecular Science and Biotechnology Institute, Department of Biochemistry and Pharmacology, University of Melbourne, Parkville, VIC, Australia; <sup>3</sup>Walter and Eliza Hall Institute of Medical Research, 1G Royal Parade, Parkville, VIC 3052, Australia; <sup>4</sup>Department of Medical Biology, University of Melbourne, Parkville, VIC 3052, Australia

**Correspondence:** Christopher R. Horne ([horne.c@wehi.edu.au](mailto:horne.c@wehi.edu.au))

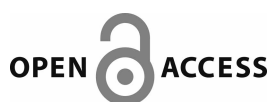

Transcription is the principal control point for bacterial gene expression, and it enables a global cellular response to an intracellular or environmental trigger. Transcriptional regulation is orchestrated by transcription factors, which activate or repress transcription of target genes by modulating the activity of RNA polymerase. Dissecting the nature and precise choreography of these interactions is essential for developing a molecular understanding of transcriptional regulation. While the contribution of X-ray crystallography has been invaluable, the ‘resolution revolution’ of cryo-electron microscopy has transformed our structural investigations, enabling large, dynamic and often transient transcription complexes to be resolved that in many cases had resisted crystallisation. In this review, we highlight the impact cryo-electron microscopy has had in gaining a deeper understanding of transcriptional regulation in bacteria. We also provide readers working within the field with an overview of the recent innovations available for cryo-electron microscopy sample preparation and image reconstruction of transcription complexes.

## Introduction

The expression of a gene to assemble a protein (the Central Dogma) is a fundamental process of life. Transcription is the first step in gene expression, which is coordinated by a complex of proteins that cooperate at the promoter region to transcribe the DNA gene sequence into mRNA. The lead actor of transcription, RNA Polymerase (RNAP), comprises a core subunit of proteins labelled  $\alpha_2\beta\beta'$  (Figure 1A) [1]. Upon interaction with a sigma ( $\sigma$ )-factor, RNAP forms the active holoenzyme [2,3]. Sigma factors are large, multi-domain proteins that bind various sites across the core RNAP and promoter DNA [4], and are responsible for guiding RNAP to the transcription start sites by locating the  $-35$  element (consensus sequence TTGACA) and the  $-10$  element (consensus sequence TATAAT) within the promoter [5] (Figure 1A). These two DNA elements constitute major features of a bacterial promoter and serve as notable controllers of transcriptional activity. Bacterial promoters are also decorated with other regulatory components, such as  $-10$  extension (EXT) [6], discriminator (DISC) [7,8], and the upstream element (UP element) [9]. Once RNAP holoenzyme binds DNA, a series of conformational changes serve to manipulate the DNA and unwind a 13 base pair region (promoter melting) to initiate transcription.

In bacteria, the regulation of gene expression occurs primarily at transcription initiation, allowing bacteria to maintain homeostasis and adapt to changing environmental conditions, such as nutrient availability, by changing which genes are expressed, and which are not [excellent reviews on gene regulation focused on initiation can be found here [10,11]]. Transcriptional regulation in bacteria is predominantly modulated by transcription factors, an important class of *trans*-acting factor, that bind DNA and function as either activators or repressors of gene expression (Figure 1B). Whereas

Received: 1 October 2021  
 Revised: 10 November 2021  
 Accepted: 15 November 2021

Version of Record published:  
 2 December 2021

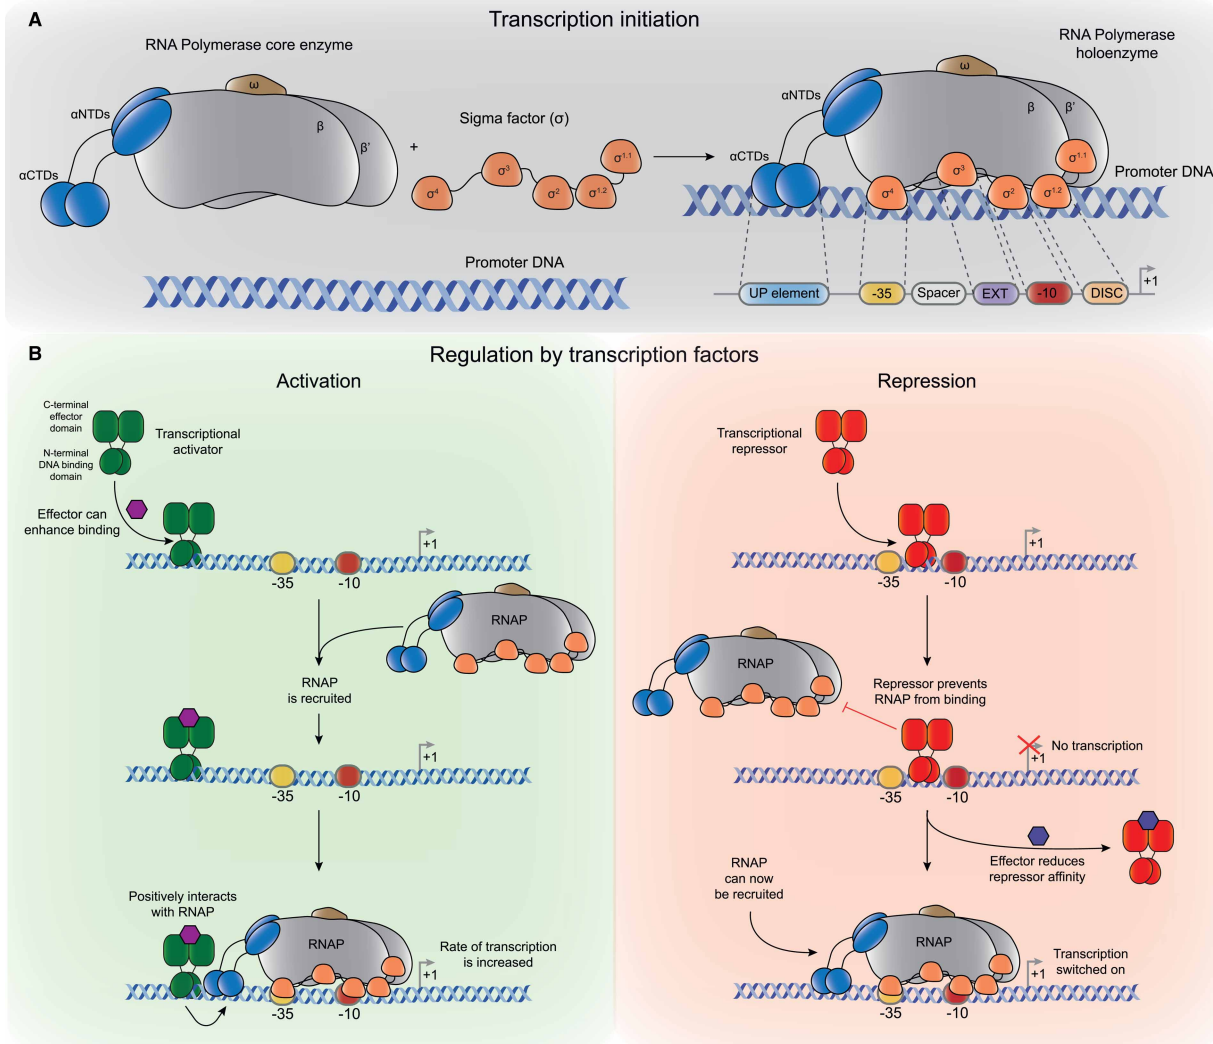

**Figure 1. Schematic model of bacterial transcription initiation and regulation by transcription factors.**

(A) In bacteria, transcription is initiated by the formation of the RNA polymerase (RNAP) holoenzyme, which comprises the RNAP core and a sigma ( $\sigma$ ) factor (e.g.  $\sigma^{70}$ ). Upon interaction with promoter DNA, the RNAP holoenzyme forms a closed transcription complex. The subunits of the RNAP core,  $\sigma$  factor and sequence-specific interactions with the promoter DNA are illustrated. RNAP core:  $\alpha$  N-terminal/C-terminal domains ( $\alpha$ NTD/CTD) – blue;  $\beta$  and  $\beta'$  – grey;  $\omega$  – black.  $\sigma$  factor – orange, linker regions (black lines). Promoter DNA (grey): UP element – cyan; –35 element – yellow; spacer – white; extended –10 (EXT) – violet; –10 element – dark red; discriminator (DISC) – peach; transcription start site (+1, arrow). Sequence-specific interactions are highlighted with dash lines. (B) Transcription factors, known as activators or repressors can activate or repress transcription initiation, respectively. The general mechanism of each is shown here. Transcriptional activators (left panel, green) bind to a site upstream of the promoter (–35 and –10 element) and transcription start site (+1, arrow) where they can recruit the RNAP holoenzyme by interacting with the C-terminal of the  $\alpha$ -subunit ( $\alpha$ CTD) of RNAP. This process can be enhanced by small molecules or effectors (purple hexagon) to increase the rate of transcription. In contrast, transcriptional repressors (right panel, red) bind to a site that overlaps the core –35 and –10 elements of the promoter to directly block the binding of RNAP to the promoter, switching gene transcription off (shown by red cross). In the presence of an effector (blue hexagon) the DNA affinity is reduced, and the repressor dissociates from the promoter. This allows RNAP to be recruited, switching gene transcription on.

transcriptional activators generally bind upstream of the RNAP-binding site to co-opt RNAP and enhance activity, transcriptional repressors bind to the operator region of target genes to directly obstruct the binding and activity of the RNAP [10,12].

Transcription factors largely share a common domain architecture, comprising an N-terminal DNA-binding domain and a C-terminal effector-binding domain, typically connected by a flexible linker (Figure 1B). The

DNA-binding domain recognises a specific DNA sequence and most often contains the highly conserved, helix-turn-helix motif, while the effector-binding domain functions as a signal sensor [13]. In general, the effector is a small molecule or pathway metabolite that allosterically binds the protein to trigger a conformational change that alters the affinity of the DNA-binding domain to the target sequence [12,13]. This collective function enables transcription factors to act as molecular switches, enabling bacteria to rapidly respond to sudden environmental challenges [14].

In addition to transcription factors that directly modulate RNAP activity,  $\sigma$ -factors also serve as an important class of *trans*-acting factor. By acting in complex with RNAP,  $\sigma$ -factors facilitate broader changes, such as the expression of genes required for bacterial cell viability [10,12] (reviewed here [10,15,16]). Overall, RNAP serves as the core element of gene regulation, combining information from an assortment of sensory systems to appropriately modulate gene expression — the net outcome is to determine which genes are transcribed, and to what extent, under any specific growth condition [17].

Over the past few decades, structural biology has been instrumental for defining these regulatory mechanisms and the biological function of RNAP during transcription [18]. Yet, despite a focused effort to delineate these processes, principally through X-ray crystallography, technical limitations have restricted our molecular understanding of transcriptional regulation. Notably, these include the intrinsic flexibility, conformational/compositional heterogeneity, and transient nature of the transcription complexes [19,20]. Crystal growth is usually easiest when the macromolecules are stably folded, can be concentrated, are homogenous (i.e. purified away from all other contaminants and in a stable oligomeric state), and have limited flexibility. Fuelled by technological breakthroughs in data collection and imaging processing (reviewed in [21]), cryo-electron microscopy (cryo-EM) now offers a powerful alternative to overcome these challenges. This capacity has granted researchers the power to ‘see’ transient or heterogeneous complexes that are unamenable to crystallisation and determine their structure at or near atomic-level resolution.

Herein, we review the contribution of cryo-EM to further our understanding of transcriptional regulation in bacteria, with a focus on studies that have provided key mechanistic insights into transcription initiation. We also highlight state-of-the-art sample preparation and 3D reconstruction strategies for structure determination with a particular focus on ‘tricks’ for protein–nucleic acid complexes.

## Recent cryo-EM structures advance our understanding of bacterial transcriptional regulation

Visualising transcription complexes at the atomic level is essential for unravelling their mechanism of function. Over the past few years, cryo-EM has been indispensable for resolving large and heterogeneous complexes, where previous crystallographic studies have come up short, providing over 65 structures to date (summarised in Table 1). Here, we highlight pivotal transcription complexes active during transcription initiation, which contain transcriptional activators and repressors that until the advent of cryo-EM weren’t fully understood.

### Transcriptional activators

Activators serve to increase transcription by binding at, or upstream, of a promoter region, where they can positively interact with and recruit RNAP to initiate transcription of target genes (Figure 1B, left panel). This process can be achieved by the activator distorting promoter DNA to facilitate RNAP binding, or by directly tethering RNAP to the promoter region. To illustrate how each regulatory mechanism enhances RNAP binding, we outline two recent cryo-EM structures, respectively below.

The cryo-EM structure of MerR family regulator EcmrR provides our first example of DNA distortion (Figure 2A). Promoters that bind this family contain an additional 2 to 3 base pairs (or non-canonical space) between the  $-35$  and  $-10$  elements, which prevents optimal promoter recognition by RNAP and transcription initiation [48,49]. In contrast, a canonical promoter contains a 17 base pair spacer region between the  $-35$  and  $-10$  elements. MerR regulators bind and twist the non-optimal DNA spacer, such that the DNA promoter elements are readily recognisable by the RNAP holoenzyme (Figure 2A, inset). While previous crystal structures of MerR regulators in the absence of RNAP reported this DNA distortion [50,51], multiple cryo-EM structures of EcmrR in complex with RNAP provided a deeper molecular understanding of this promoter remodelling [22]. Similarly, cryo-EM was also used to dissect the DNA distortion mechanism from another MerR family regulator, BmrR [23].

**Table 1 Summary of bacterial transcription complex structures resolved by cryo-EM**

Part 1 of 2

| Transcription complex                                                                    | Family | Organism                          | EMDB ID    | PDB ID       | Reference |
|------------------------------------------------------------------------------------------|--------|-----------------------------------|------------|--------------|-----------|
| EcmrR-RP <sub>0</sub> <sup>2</sup>                                                       | MerR   | <i>Escherichia coli</i>           | EMD-22234  | 6XL5         | [22]      |
| EcmrR-RP <sub>0</sub> <sup>2</sup> (EcmrR-spacer DNA complex)                            |        |                                   | EMD-22235  | 6XL6         |           |
| EcmrR-RP <sub>int</sub> <sup>3</sup> with 3 nt RNA transcript                            |        |                                   | EMD-22236  | 6XL9         |           |
| EcmrR-RP <sub>int</sub> <sup>3</sup> with 3 nt RNA transcript (EcmrR-spacer DNA complex) |        |                                   | EMD-22237  | 6XLA         |           |
| EcmrR-RP <sub>int</sub> <sup>3</sup> with 4 nt RNA transcript                            |        |                                   | EMD-22245  | 6XLJ         |           |
| EcmrR-RP <sub>int</sub> <sup>3</sup> with 4 nt RNA transcript (EcmrR-spacer DNA complex) |        |                                   | EMD-22246  | 6XLK         |           |
| EcmrR-RP <sub>0</sub> <sup>2</sup> (clearer $\sigma^{70}$ density)                       |        |                                   | EMD-23291  | -            |           |
| BmrR-RNA polymerase complex                                                              | MerR   | <i>Bacillus subtilis</i>          | EMD-30390  | 7CKQ         | [23]      |
| CueR-RNA polymerase complex (without RNA transcript)                                     | MerR   | <i>Escherichia coli</i>           | EMD-22184  | 6XH7<br>6XH8 | [24]      |
| CueR-RNA polymerase complex (with RNA transcript)                                        |        |                                   | EMD-22185  |              |           |
| CueR-RNA polymerase complex (clearer $\sigma^{70}$ density)                              |        |                                   | EMD-22289  |              |           |
| CueR-RNA polymerase complex                                                              | MerR   | <i>Escherichia coli</i>           | EMD-30268  | 6LDI         | [25]      |
| CueR-RNA polymerase complex (with fully duplex DNA)                                      |        |                                   | EMD-0874   | 7C17         |           |
| NanR-dimer <sub>1</sub> /DNA complex                                                     | GntR   | <i>Escherichia coli</i>           | EMD-21652  | 6WFQ         | [26]      |
| NanR-dimer <sub>3</sub> /DNA complex                                                     |        |                                   | EMD-21661  | 6WG7         |           |
| BusR-tetramer <sub>1</sub> /pAB DNA complex                                              | GntR   | <i>Streptococcus agalactiae</i>   | EMD-13119  | 7OZ3         | [27]      |
| BusR-tetramer <sub>1</sub> /pAB <sub>1</sub> DNA complex                                 |        |                                   | EMD-12051  | 7B5Y         |           |
| TraR-E $\sigma^{70}$ (state I)                                                           | LuxR   | <i>Escherichia coli</i>           | EMD-0348   | 6N57         | [28]      |
| TraR-E $\sigma^{70}$ (state II)                                                          |        |                                   | EMD-0349   | 6N58         |           |
| TraR-E $\sigma^{70}$ (state III)                                                         |        |                                   | EMD-20231  | N/A          |           |
| MmfR-dimer <sub>2</sub> /DNA complex                                                     | TetR   | <i>Streptomyces coelicolor</i>    | EMD-20781  | N/A          | [29]      |
| Class-II CAP-TAC <sup>1</sup> without RNA transcript (state I)                           | CAP    | <i>Escherichia coli</i>           | EMD-20287  | 6PB5         | [30]      |
| Class-II CAP-TAC <sup>1</sup> without RNA transcript (state II)                          |        |                                   | EMD-20288  | 6PB6         |           |
| Class-II CAP-TAC <sup>1</sup> with RNA transcript (state II)                             |        |                                   | EMD-20286  | 6PB4         |           |
| Class-I CAP-TAC <sup>1</sup>                                                             | CAP    | <i>Escherichia coli</i>           | EMD-7059   | 6B6F         | [31]      |
| Class-I CAP-TAC <sup>1</sup> (focused map on $\alpha$ CTD-CAP region)                    |        |                                   | EMD-7060   |              |           |
| CrI-E $\sigma^S$ -RNA polymerase complex                                                 | CrI    | <i>Escherichia coli</i>           | EMD-200090 | 6OMF         | [32]      |
| Spx-RNA polymerase complex                                                               | Spx    | <i>Bacillus subtilis</i>          | EMD-31485  | 7F75         | [33]      |
| WhiB7-RP <sub>0</sub> <sup>2</sup>                                                       | WhiB   | <i>Mycobacterium tuberculosis</i> | EMD-22886  | 7KIF         | [34]      |
| WhiB7-RP <sub>0</sub> <sup>4</sup>                                                       |        |                                   | EMD-22887  | 7KIM         |           |
| Rgg2-short hydrophobic peptide complex                                                   | Rgg    | <i>Streptococcus thermophilus</i> | EMD-22341  | 7JI0         | [35]      |
| GreB-RNA polymerase elongation complex (pre-RNA cleavage)                                | Gre    | <i>Escherichia coli</i>           | EMD-4892   | 6RIN         | [36]      |
| GreB-RNA polymerase elongation complex (post-RNA cleavage)                               |        |                                   | EMD-4885   | 6RI7         |           |
| GreB-RNA polymerase reactivated complex (before RNA extension)                           |        |                                   | EMD-4882   | 6RH3         |           |
| CarD-RP <sub>0</sub> <sup>2</sup>                                                        | CarD   | <i>Mycobacterium tuberculosis</i> | EMD-9037   | 6EDT         | [37]      |
| CarD-RNA polymerase intermediate (with 8-nt RNA transcript)                              |        |                                   | EMD-9039   | 6EE8         |           |

Continued

**Table 1 Summary of bacterial transcription complex structures resolved by cryo-EM**

Part 2 of 2

| Transcription complex                                                                               | Family   | Organism                          | EMDB ID   | PDB ID | Reference |
|-----------------------------------------------------------------------------------------------------|----------|-----------------------------------|-----------|--------|-----------|
| CarD-RP <sub>o</sub> <sup>2</sup> (with coralopyronin A)                                            |          |                                   | EMD-9041  | 6EEC   |           |
| CarD-RNA polymerase holoenzyme (with coralopyronin A)                                               |          |                                   | EMD-9047  | 6M7J   |           |
| CarD-RP <sub>o</sub> <sup>2</sup> (with Sorangicin A)                                               | CarD     | <i>Mycobacterium tuberculosis</i> | EMD-21407 | 6VYV   | [38]      |
| CarD-S <sup>456L</sup> -RP <sub>o</sub> <sup>2</sup> (with Sorangicin A)                            |          |                                   | EMD-21408 | 6VW0   |           |
| CarD-RP <sub>o</sub> <sup>2</sup> (with Sorangicin A) (with 8-nt RNA transcript)                    |          |                                   | EMD-21406 | 6VWX   |           |
| CarD-S <sup>456L</sup> -RP <sub>o</sub> <sup>2</sup> (with Sorangicin A) (with 8-nt RNA transcript) |          |                                   | EMD-21409 | 6VWZ   |           |
| SspA-σ <sup>70</sup> -RP <sub>o</sub> <sup>2</sup>                                                  | GST      | <i>Escherichia coli</i>           | EMD-30307 | 7C97   | [39]      |
| DksA-RP <sub>o</sub> <sup>2</sup> (State I) with guanosine tetraphosphate (ppGpp)                   | DksA     | <i>Escherichia coli</i>           | EMD-21881 | 7KHI   | [40]      |
| DksA-RP <sub>o</sub> <sup>2</sup> (State II) with guanosine tetraphosphate (ppGpp)                  |          |                                   | EMD-21883 | 7KHE   |           |
| NusG-opsEC                                                                                          | NusG     | <i>Escherichia coli</i>           | EMD-7351  | 6C6U   | [41]      |
| RfaH-NusG-N-Term-opsEC                                                                              | RfaH     |                                   | EMD-7350  | 6C6T   |           |
| RfaH-full-length-opsEC                                                                              | RfaH     |                                   | EMD-7349  | 6C6S   |           |
| RNAP-HelD                                                                                           | HelD     | <i>Bacillus subtilis</i>          | EMD-21921 | 6WVK   | [42]      |
| <i>Msm</i> HelD–RNAP complex State I                                                                | HelD     | <i>Mycobacterium smegmatis</i>    | EMD-10996 | 6YXU   | [43]      |
| <i>Msm</i> HelD–RNAP complex State II                                                               |          |                                   | EMD-11004 | 6YYS   |           |
| <i>Msm</i> HelD–RNAP complex State III                                                              |          |                                   | EMD-11026 | 6Z11   |           |
| Spt4/5-RNAP complex (with antibodies)                                                               | Spt4/5   | <i>Pyrococcus furiosus</i>        | EMD-1840  | N/A    | [44]      |
| Mfd-dependent transcription termination complex                                                     | Mfd      | <i>Thermus thermophilus</i>       | EMD-30117 | 6M6A   | [45]      |
| Mfd-dependent transcription termination complex with ATP <sub>γ</sub> S                             | Mfd      |                                   | EMD-30118 | 6M6B   |           |
| Mfd-bound RNA polymerase elongation complex – L1 state (with ATP)                                   | Mfd      | <i>Escherichia coli</i>           | EMD-21996 | 6X26   | [46]      |
| Mfd-bound RNA polymerase elongation complex – L2 state (with ADP)                                   |          |                                   | EMD-22006 | 6X2F   |           |
| Mfd-bound RNA polymerase elongation complex – I state                                               |          |                                   | EMD-22012 | 6X2N   |           |
| Mfd-bound RNA polymerase elongation complex – II state                                              |          |                                   | EMD-22039 | 6X43   |           |
| Mfd-bound RNA polymerase elongation complex – III state                                             |          |                                   | EMD-22043 | 6X4W   |           |
| Mfd-bound RNA polymerase elongation complex – IV state                                              |          |                                   | EMD-22044 | 6X4Y   |           |
| Mfd-bound RNA polymerase elongation complex – V state                                               |          |                                   | EMD-22045 | 6X50   |           |
| σ <sup>70</sup> -RP <sub>o</sub> <sup>2</sup>                                                       | σ-factor | <i>Klebsiella pneumoniae</i>      | EMD-0001  | 6GH5   | [47]      |
| σ <sup>70</sup> -RNA polymerase (intermediate partially loaded) complex                             |          |                                   | EMD-0002  | 6GH6   |           |
| σ <sup>70</sup> -RNA polymerase (initially transcribing) complex                                    |          |                                   | EMD-4397  | 6GFW   |           |

<sup>1</sup>CAP-TAC, cAMP receptor protein-dependent transcription activation complex.

<sup>2</sup>RP<sub>o</sub>, RNA polymerase-promoter open complex.

<sup>3</sup>RP<sub>int</sub>, RNA polymerase-promoter initial transcribing complex.

<sup>3</sup>RP<sub>c</sub>, RNA polymerase-promoter closed complex.

N/A, Not available.

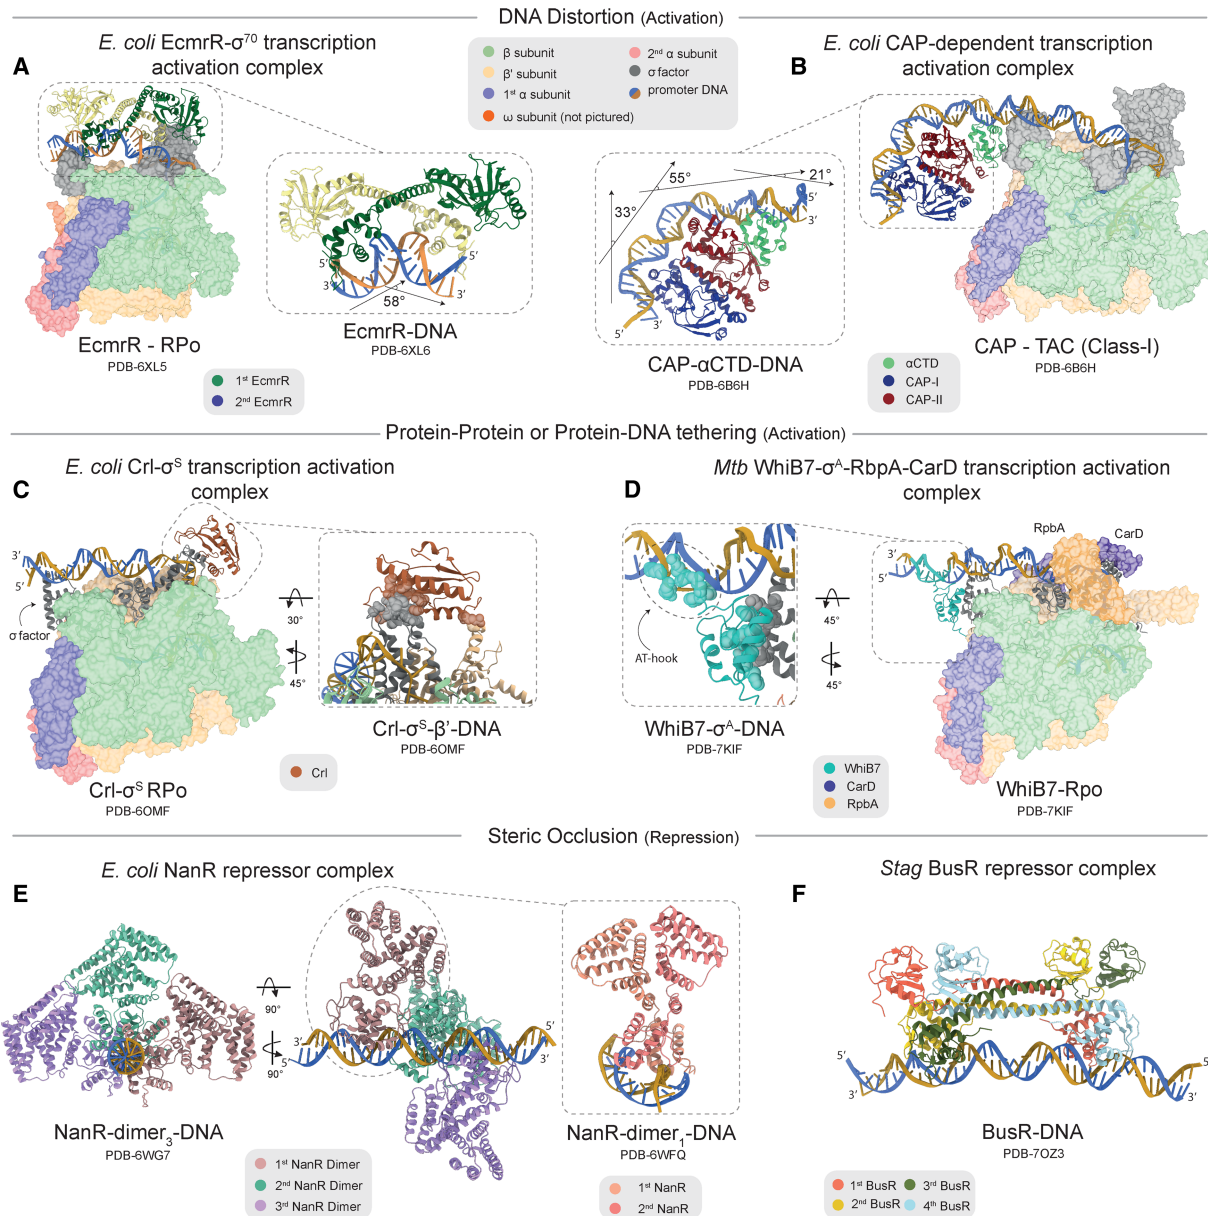

**Figure 2. Recent bacterial transcription complexes solved by cryo-EM.**

Part 1 of 2

Examples (A,B) of transcriptional activator complexes that distort DNA. (A) Dimeric EcmrR in complex with promoter DNA (cartoon inset, PDB-6XL6), remodels (58° kink) the promoter DNA to create the optimal promoter architecture for *E. coli* holoenzyme [ $\sigma^{70}$  (grey surface) RNAP ( $\alpha_2\beta\beta'\omega$  surface colour shown in shaded box)] to form the EcmrR-RPo (PDB-6XL5) [22]. (B) Overview of the *E. coli* class-1 CAP-TAC (PDB-6B6H). The cyclic adenosine 3',5'-monophosphate receptor (CAP) protein dimer (dark blue and dark red, cartoon inset), binds its cognate DNA and  $\alpha$ CTD of RNAP (green) to introduce three DNA kinks (33°, 55°, 21°). This results in a full 92° turn, optimally orienting the promoter DNA for  $\sigma^{70}$ -RNAP to bind [31]. Examples of transcription factors that stabilise aspects of the transcription complex are shown in C and D. (C) Crl (dark orange cartoon) binds residues of the  $\beta'$  clamp (beige cartoon) on *E. coli* RNAP and alternative  $\sigma$  factor  $\sigma^S$  (grey cartoon) through a distinct interface (shown by spheres) in the left inset. This tethering action creates a Crl- $\sigma^S$ -RNAP complex that binds alternate promoter DNA to form the Crl- $\sigma^S$ -RPo complex (PDB-6OMF) shown to the right of the inset [32]. (D) WhiB7 (cyan, cartoon) is a transcriptional activator in *Mycobacterium tuberculosis* (*Mtb*) that binds an AT-rich 'hook' sequence of DNA (shown by arrow) and  $\sigma^A$  (cartoon inset). By binding the active *Mtb* RNAP holoenzyme (surfaces coloured as *E. coli* RNAP), it creates the WhiB7-RPo (PDB-7KIF) [34]. Examples of steric occlusion in transcriptional repressors are shown in E and F. (E) Three *E. coli* NanR dimers binds three GGTATA repeats to form a NanR-dimer<sub>3</sub>/DNA complex. Their close proximity allows intramolecular protein-protein interactions to stabilise the multimeric assembly (PDB-6WG7). The 70.5 kDa cryo-EM structure of dimeric NanR in complex with

**Figure 2. Recent bacterial transcription complexes solved by cryo-EM.**

Part 2 of 2

cognate DNA (PBD-6WFQ) [26]. (F) *Streptococcus agalactiae* (Stag) BusR binds palindromic promoter DNA as a tetramer to repress transcription (PDB-7OZ3) [27]. The 5' and 3' DNA strands have been annotated throughout.

Our second example of DNA distortion is illustrated by the role of the global transcription factor, cyclic AMP (cAMP) receptor protein (CAP) to promote transcription. Two major classes of CAP exist, each of which can activate and initiate transcription by bending DNA to optimise RNAP recruitment [52]. These classes are differentiated by their promoter site and interaction mode with RNAP; class-I CAPs bind a  $-61$  site and interact predominantly with  $\alpha$ CTD subunit of RNAP (Figure 1A), while class-II CAPs bind at a  $-41$  site and interact with multiple RNAP subunits. As the CAP–RNAP interactions are small, and the full CAP–RNAP–DNA complex is dynamic, any CAP-induced conformational changes in the presence of RNAP are difficult to capture by the freeze-frame feature of crystallography [52,53]. Recently, an intact transcription activation complex, containing a class-I CAP along with RNAP was resolved by cryo-EM (Figure 2B). This structure revealed extensive remodelling of the promoter DNA ( $\sim 90^\circ$  kink) induced by CAP-binding (Figure 2B, inset) to wrap upstream DNA and co-opt RNAP via  $\alpha$ CTD binding [31]. An analogous study reported the cryo-EM structure of the class-II CAP–RNAP complex [30]. Taken together, these structures shed light into how class-I and -II CAP activation complexes assemble to activate transcription.

Alternatively, an unconventional mode of activation involving protein tethering can stabilise and activate RNAP via a DNA-independent or -dependent process. DNA-independent modes involve activators that stabilise  $\sigma$ -factor and RNAP association solely through protein–protein interactions. This unusual mode of activation was first hypothesised using crystallography, but many interactions were absent due to crystal packing [54,55]. However, numerous cryo-EM structures of transcriptional activators, Crl [32], RbpA/CarD [37,38], Spx [33] and SspA [39], can now detail the precise interactions and conformational changes between the  $\sigma$ -factor that facilitate the formation of the RNAP holoenzyme. To highlight this protein–protein tethering mode, we present the structure of Crl bound to  $\sigma^S$  and a small domain of the  $\beta'$  subunit to stabilise the holoenzyme (Figure 2C). Conversely, structural insight into DNA-dependent tethering was revealed through cryo-EM structures of WhiB7, which play a role in antibiotic resistance in mycobacteria. In addition to forming protein–protein contacts with the  $\sigma$ -factor, WhiB7 was observed to interact with promoter DNA via an AT-hook motif [34] (Figure 2D). This was unexpected as AT-hooks are rare in bacteria, yet common in eukaryotes [56]. Thus, these structures expand our understanding of how WhiB7 serves to regulate antibiotic resistance in mycobacteria, but also unearths a novel mode of transcriptional regulation in bacteria.

## Transcriptional repressors

Repressors function to sterically occlude RNAP binding to DNA by occupying a site that overlaps the  $-35$  and  $-10$  promoter elements to prevent  $\sigma$ -factor recognition, switching gene transcription off [11] (Figure 1B, right panel). We illustrate this mode of regulation below.

Recently, it was shown that *Escherichia coli* NanR, which regulates bacterial sialic acid metabolism [57–60], cooperatively binds a three-repeat sequence overlapping the  $-10$  element [26]. Through cryo-EM, three NanR dimers were observed to assemble in close proximity across the promoter, where intramolecular protein–protein interactions stabilise the repressor complex (Figure 2E). This multimeric assembly is unique among reported GntR-type regulators [26]. The lower-order NanR-dimer<sub>1</sub>/DNA complex (70.5 kDa) was also resolved within the study at near atomic resolution, demonstrating the power of cryo-EM in this so-called ‘resolution revolution’ (Figure 2E, inset). Similarly, cooperative binding was also observed for the TetR-type regulator, Mmfr, where two dimers bound DNA at an obtuse angle of  $140^\circ$  in the cryo-EM structure [29].

BusR is a transcriptional repressor that binds the *c*-di-AMP molecule; a vital molecule in normal cellular growth conditions and a target for antibiotic development [61]. A recent cryo-EM structure of BusR revealed how it binds bipartite DNA motifs (Figure 2F) as a tetramer and proposes a new regulator family, as the protein architecture is unlike any other transcriptional regulator described [27].

Briefly, we would be remiss not to mention how cryo-EM has had a marked impact on functionally understanding the transcription factor TraR, which functions both as an activator and repressor. Using cryo-EM, Chen et al. [28] resolved a series of structures that, alongside *in vitro* experiments, helped elucidate the transition of active RNAP from R<sub>Pc</sub> (closed complex) to R<sub>Po</sub> (open complex) in the presence of TraR. The

deconvolution of heterogeneous intermediate conformations allowed researchers to propose a mechanism, and use biochemical techniques to validate it [62]. The understanding of this conformational landscape by cryo-EM is a pivotal discovery within the field, as it has structurally illuminated the complicated and multifaceted mechanism of transcription initiation.

## Contemporary cryo-EM strategies for resolving protein–DNA complexes

Having highlighted how cryo-EM has transformed our understanding of transcriptional regulation in bacteria, we now outline contemporary cryo-EM strategies for determining the structure of these dynamic macromolecular assemblies, particularly protein–DNA complexes. This overview will include the recent and ongoing developments in sample preparation and structure determination (summarised in Figure 3). Further discussion on data acquisition, image processing, and refinement are beyond the scope of this review (but are reviewed in [63,64]).

### Sample preparation

Sample preparation for cryo-EM is paramount. In an ideal case, upon vitrification, the sample would be free of contamination, randomly oriented and evenly distributed in a monolayer of thin ice [74,75]. In reality, two main elements must be optimised to achieve this outcome — sample preparation and grid preparation. Sample preparation involves the purification of the protein or macromolecular complex in an intact and stable manner [74,76]. Given this process isolates the sample from its cellular environment, the buffering conditions must be optimised (e.g. salt, pH) to emulate native conditions. This can be achieved systematically and in high throughput using thermal stability assays [77], such as ProteoPlex [78], which is based on differential scanning

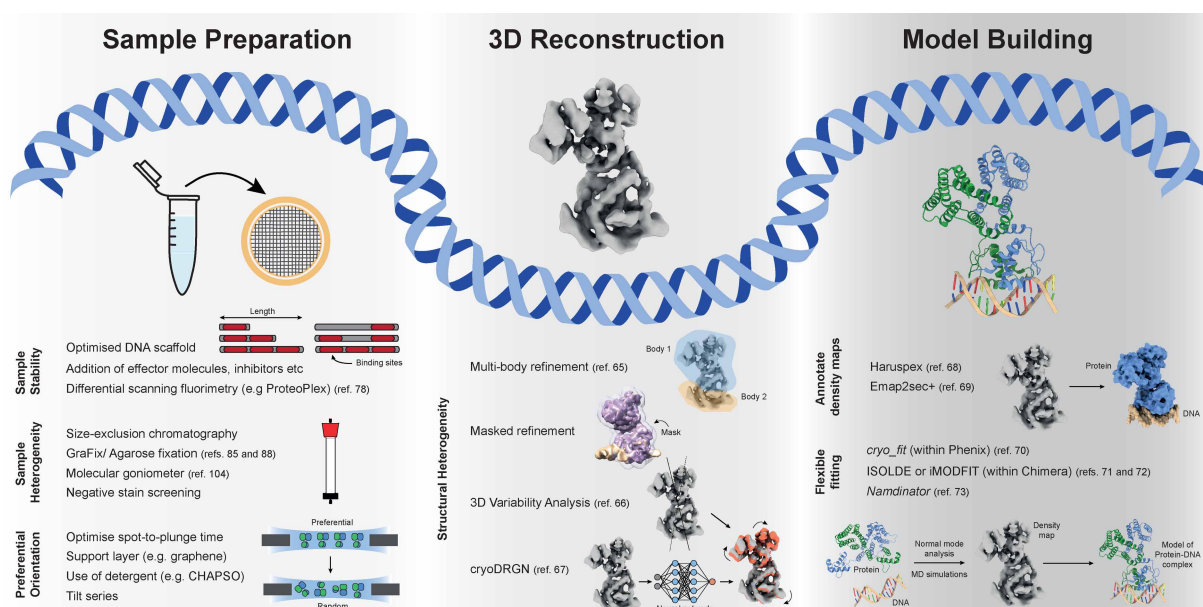

**Figure 3. Contemporary cryo-EM strategies for solving protein–DNA complexes.**

Recent innovations in sample preparation (left panel), 3D reconstruction (middle panel) and model building (right panel) are illustrated. During sample preparation (left panel) there are three facets that must be optimised: sample stability (e.g. optimising the length and number of binding sites within the DNA scaffold); sample homogeneity (using size exclusion chromatography); and preferential orientation (optimising spot-to-plunge time). To combat structural heterogeneity during 3D reconstruction (middle panel) and explore dynamics, multi-body refinement [65], masked refinement, 3D variability analysis [66] or cryoDRGN, using a neural network [67] can be employed. Density map is shown in grey, with hypothetical flexibility shown in orange. To annotate density maps during model building (right panel), Haruspex [68] or Emap2sec+ [69] can be utilised. As transcription complexes are dynamic assemblies, flexible fitting tools (*cryo\_fit* [70], ISOLDE [71], iMODFIT [72] or *Namdinator* [73]) are required to fit PDB components (e.g. protein and DNA) into a cryo-EM density map (shown in grey) to generate a model (shown on the bottom right of panel). Cryo-EM data, maps and models are from ref. 63 (EMD-21652, PDB-6WFQ).



fluorimetry. Common additives such as glycerol, which mimic a crowded environment for stability is largely avoided within the cryo-EM community, because it significantly decreases contrast during data collection [76,79,80]. However, recent evidence suggests  $\leq 20\%$  glycerol can improve the stability of large complexes that are prone to disassembly, without compromising data quality and therefore should not be fully discounted as an additive in cryo-EM [81]. Enhanced stability can also be afforded by the addition of small effector molecules (particularly for transcriptional activators), co-factors or inhibitors that may stabilise or biochemically arrest the macromolecule in a unique functional state [22,82].

Knowledge of the specific DNA sequence that your protein–DNA system binds is critical. This includes the kinetics of your system ( $K_D$ ,  $k_{on}$ ,  $k_{off}$ ) and stoichiometry of the protein–DNA interaction, which can vary by the length or number of binding sites within the DNA scaffold and by protein concentration. Thus, these elements must be carefully evaluated both biochemically and biophysically to inform the optimal DNA scaffold and concentrations you should use for grid preparation.

To perform their function, protein–DNA complexes undergo dynamic conformational rearrangements across one or more subunits [18,83]. While this conformational heterogeneity can typically be tackled during image processing through independent 3D classification and masked refinement (discussed below), sources of compositional heterogeneity must be mitigated. These sources include variations in the stoichiometry of the interaction partners, partially assembled complexes or the presence of assembly intermediates [75,76,80]. At the biochemical level, these phenomena can be addressed through sample preparation procedures, mostly commonly via size exclusion chromatography to remove aggregates or unbound components and isolate a target complex [22,23,26,29]. If complexes are inherently fragile, researchers have successfully employed a fractionation technique, named GraFix, to prepare homogeneous cryo-EM samples [39,84–86]. Here, using centrifugation, a density gradient (e.g. glycerol) is combined with weak chemical fixation (e.g. glutaraldehyde), which leads to the formation of monodisperse and chemically stabilised complexes [85,87]. The use of a weak fixation reagent is advantageous as it largely favours the formation of intramolecular crosslinks, which can prevent complex dissociation. To avoid reduced contrast, the density solution is removed by buffer exchange (Zeba) spin columns [85]. If the sample is scarce or unstable following removal of the density solution, agarose fixation offers an alternative strategy [88].

Following grid preparation [reviewed in [74,89]], which is largely dependent on user expertise and experience, sample stability, heterogeneity and particle distribution can be assessed by iterative negative stain experiments or under cryogenic temperatures [74,75,79]. When vitrified, protein–DNA complexes often preferentially adhere to the air–water interface or grid support [90]. This preferred particle orientation can lead to under sampling of some structural features, sample denaturation and anisotropic resolution in the density map [91,92]. Experimentally, this can be addressed by reducing the time interval between sample application to the grid and vitrification (spot-to-plunge time) [90,93,94], the use of support layer (e.g. graphene) to sequester the complex from the air–water interface [92,95,96] or an affinity support, such as streptavidin to immobilise biotinylated molecules [97], and by data collection at a fixed tilt-angle [98]. When acquiring data at a single tilt, gold foil grids can be used to minimise beam-induced movement during imaging [99,100]. Notably, bacterial RNAP transcription complexes suffer from severe preferential orientation [101], however, this is routinely combated by the addition of the zwitterionic detergent CHAPSO during sample preparation [22,23,39,40]. Other detergents, such as  $\beta$ -octyl glucoside have also been used to promote random particle distribution and discourage complex dissociation [27,102,103]. Recently, molecular goniometers have been constructed using DNA origami, which enable the DNA-binding protein to bind and be precisely oriented via a sequence-specific DNA stage [104]. As proof-of-concept, this nanoscale technology was utilised to resolve the 82 kDa DNA-binding protein, BurrH [104]. Moving forward, this concept can be adaptable to other small (<100 kDa) or asymmetric protein–DNA complexes.

## Structure determination

3D reconstruction and model building represent the final hurdle towards determining a structure within the cryo-EM workflow. As previously discussed, protein–DNA complexes are driven by functionally relevant conformational and compositional changes as part of their dynamic modes of action [18,83]. While this intrinsic feature poses challenges for structure determination by cryo-EM, recent innovations make it possible to study these dynamic assemblies and gain unique insights into their molecular mechanism. In this section, we highlight these key innovations, which include algorithms to visualise molecular motions and identify interacting components, along with tools for flexible fitting in cryo-EM maps by molecular dynamics.

During data acquisition, millions of snapshots across a conformational landscape are captured for the molecule of interest. This structural heterogeneity has typically been approached using various ‘3D classification’ or ‘heterogeneous refinement’ tools, implemented in cryo-EM software packages such as RELION [105], cryoSPARC [106] or cisTEM [107]. These tools effectively divide the data into a small number of independent and discrete states, each of which are assumed to be structurally homogeneous. However, in scenarios where macromolecular complexes exhibit continuous conformational transitions of single domains or motions across multiple domains, these discrete classification algorithms are ineffective for heterogeneous reconstruction as they often omit functionally relevant or transient states [83]. As a result, more focused approaches have evolved to deal with continuous flexibility in cryo-EM data. These include, multi-body refinement, which uses a discrete number of independently moving, rigid bodies to model the dynamics within a protein complex and improve density maps of flexible regions [65,108]. Implemented in RELION, this multi-body approach has been utilised to characterise the TraR-induced structural changes in *E. coli* RNAP to regulate transcription. An analogous strategy, masked 3D refinement, can also be employed to combat structural heterogeneity by applying a mask that excludes contents outside a region of interest, local resolution can be improved [26]. To avoid introducing artefacts or overfitting, generated mask are often low-pass filtered with soft edges [83]. 3D Variability Analysis (3DVA), available in cryoSPARC, is an algorithm that fits a linear subspace model to visualise molecular motions of macromolecules at high resolution [66]. 3DVA has since been utilised to resolve the dynamic interaction between RNAP and the transcription factor, HelD from *Bacillus subtilis* [42]. A similar tool, cryoDRGN (<http://cryodrgn.csail.mit.edu>), utilises deep neural networks to reconstruct density maps that model both discrete compositional heterogeneity and continuous conformational changes [67]. While these methods primarily combat motions across multiple domains, they can provide a potential trajectory to additionally refine single domain motions.

Following 3D reconstruction, atomic models provide the basis to structurally and functionally interpret the cryo-EM density maps. Most commonly, this process involves the input of existing X-ray or NMR structures from the PDB [22,26–29], however in their absence, the neural network-based, structure prediction programs, AlphaFold [109] or RoseTTA [110] now offer an alternative. To guide this initial structure into the target density map, various flexible fitting tools, such as *cryo\_fit* within phenix [70], ISOLDE [71] or iMODFIT [72] in Chimera, *Namdinator* [73] among others [29,111] can be used to accommodate conformational heterogeneity by utilising molecular dynamics simulations or normal mode analysis [112]. In scenarios where it is difficult to annotate protein and DNA in the density maps, the recent tools Haruspex [68] and Emap2sec+ [69] can be employed to detect these structures in high-resolution maps (>4 Å) and lower resolution maps 5–10 Å, respectively using neural networks. Aside from flexible fitting, atomic models can also be constructed *de novo* when the resolution is better than 3.5 Å [113]. Although the Rosetta refinement strategy can be implemented as a *de novo* model-building approach for cryo-EM maps at 3–5 Å [114]. For tools that permit further refinement and validation of these models, we direct readers to a more detailed review [115].

## Conclusion

The advent of cryo-EM, driven by advances in hardware and data processing, has revolutionised our understanding of transcription regulation in bacteria. This is evidenced by the rapidly expanding structural repertoire of bacterial transcription complexes over the past two years, with >65 resolved by cryo-EM to date. As illustrated within this review, these structures have shed light on unique conformational changes not seen in previous crystallographic studies, which include: promoter remodelling to stabilise intermediate complexes of transcription initiation [22,23,37]; insights into the conformational plasticity during the transition from transcription initiation to elongation [22,28]; the cooperative assembly of the transcriptional repressor, NanR [26]; the effector-induced reconfiguration of BusR to bind a bipartite DNA motif [27]; and the interaction of Crl and WhiB7 with RNAP to tether the  $\sigma$ -factors that they regulate through protein–protein or protein–DNA interactions, respectively [32,34]. However, despite these advancements reviewed here, gaps in our knowledge remain.

To yield a comprehensive model of transcription regulation for a given bacterial system, researchers must employ an integrative structural, biophysical and biochemical approach [116]. While cryo-EM is powerful at resolving large, conformationally dynamic assemblies, which are difficult to be captured by crystallography due to crystal packing, there are still limitations in size and resolution. In contrast, crystallography is better suited to yield atomic coordinates of macromolecules under 100–200 kDa and can attain higher resolutions (<2 Å) as molecules are constrained to a crystal lattice [117]. It is now routine to dock these smaller, more ordered

structures into cryo-EM maps using flexible fitting to accommodate minor conformational differences and allow a more in-depth interpretation of the model [112]. Hence, crystallography remains a useful tool in structural biology to complement cryo-EM studies.

In keeping with the theme of an integrative approach, small angle X-ray scattering (SAXS) can ‘observe’ the conformational landscape of transcription complexes in solution and compare this with the cryo-EM model to evaluate biological relevance [118]. Likewise, the stoichiometry and molecular mass of protein–DNA complexes can be determined in solution, using an emerging, label-free analytical ultracentrifugation method that features multi-wavelength detection to deconvolute the spectral signals of protein and DNA based on their unique optical properties [26,119,120]. Single molecule mass photometry can also be employed as a tool to determine molecular mass of complexes in solution [121]. Other tools for characterising protein–DNA interactions (reviewed in [122]), include cryo-electron tomography, NMR, mass spectrometry/cross linking, Förster resonance energy transfer (FRET) and hydrogen–deuterium exchange.

Moving forward, future structural endeavours using cryo-EM will no doubt build on the contributions highlighted here to deconvolute the complicated and often multifaceted molecular mechanisms of transcriptional regulation in bacteria. Alongside regular hardware and software improvements, we anticipate machine learning methods, such as cryoDRGN [67], along with the prospect of time-resolved cryo-EM [123,124] will enable researchers to explore more transient intermediate complexes and thus gain a deeper understanding of the molecular choreography that drives these regulatory mechanisms.

## Perspectives

- Transcription complexes are dynamic assemblies whose function is often intertwined with their many structural configurations. The precise choreography and nature of these motions remains incompletely understood. This knowledge is essential to understand the molecular mechanisms of transcription regulation in bacteria.
- Fuelled by the ‘resolution revolution’, cryo-EM has emerged to provide researchers a means of probing these larger and structurally heterogeneous macromolecules, which are sensitive to crystallisation. To date, these studies have contributed >65 complex structures and provided unprecedented insights into bacterial transcription regulation.
- The prospect of temporally linking the dynamic nature of transcription complexes remains of immense interest. Excitingly, the evolution of machine learning and time-resolved cryo-EM applications represent a future avenue to explore these transient intermediates.

## Competing Interests

The authors declare that there are no competing interests associated with the manuscript.

## Funding

R.C.J.D. acknowledges the following for funding support, in part: 1) the New Zealand Royal Society Marsden Fund (contract UOC1506); 2) a Ministry of Business, Innovation and Employment Smart Ideas grant (contract UOCX1706); and 3) the Biomolecular Interactions Centre (University of Canterbury).

## Open Access

Open access for this article was enabled by the participation of University of Melbourne in an all-inclusive *Read & Publish* pilot with Portland Press and the Biochemical Society under a transformative agreement with CAUL.

## Author Contributions

D.M.W., R.C.J.D., and C.R.H. reviewed the literature, wrote the manuscript and created the figures.

## Acknowledgements

We thank the editors from the Biochemical Society for the invitation to contribute.

## Abbreviations

3DVA, 3D Variability Analysis; CAP, cyclic AMP (cAMP) receptor protein; CryoDRGN, Cryo-Deep Reconstructing Generative Networks; Cryo-EM, Cryo-electron microscopy; CTD/NTD, C-terminal/ N-terminal domain; DNA, Deoxyribonucleic acid; EMDB, Electron Microscopy Data Bank; kDa, Kilodalton; PDB, Protein Data Bank; RNAP, RNA polymerase; RPo, RNA polymerase open complex;  $\sigma$ -factor, Sigma factor.

## References

- Burgess, R.R. (1969) Separation and characterization of the subunits of ribonucleic acid polymerase. *J. Biol. Chem.* **244**, 6168–6176 [https://doi.org/10.1016/S0021-9258\(18\)63521-5](https://doi.org/10.1016/S0021-9258(18)63521-5)
- Vassilyev, D.G., Sekine, S.I., Laptenko, O., Lee, J., Vassilyeva, M.N., Borukhov, S. et al. (2002) Crystal structure of a bacterial RNA polymerase holoenzyme at 2.6 Å resolution. *Nature* **417**, 712–719 <https://doi.org/10.1038/nature752>
- Murakami, K.S. (2002) Structural basis of transcription initiation: an RNA polymerase holoenzyme-DNA complex. *Science* **296**, 1285–1290 <https://doi.org/10.1126/science.1069595>
- Feklistov, A., Sharon, B.D., Darst, S.A. and Gross, C.A. (2014) Bacterial sigma factors: a historical, structural, and genomic perspective. *Annu. Rev. Microbiol.* **68**, 357–376 <https://doi.org/10.1146/annurev-micro-092412-155737>
- Campbell, E.A., Muzzin, O., Chlenov, M., Sun, J.L., Olson, C.A., Weinman, O. et al. (2002) Structure of the bacterial RNA polymerase promoter specificity  $\sigma$  subunit. *Mol. Cell* **9**, 527–539 [https://doi.org/10.1016/S1097-2765\(02\)00470-7](https://doi.org/10.1016/S1097-2765(02)00470-7)
- Barne, K.A., Bown, J.A., Busby, S.J.W. and Minchin, S.D. (1997) Region 2.5 of the *Escherichia coli* RNA polymerase  $\sigma$ 70 subunit is responsible for the recognition of the ‘extended –10’ motif at promoters. *EMBO J.* **16**, 4034–4040 <https://doi.org/10.1093/emboj/16.13.4034>
- Feklistov, A., Barinova, N., Sevostyanova, A., Heyduk, E., Bass, I., Vvedenskaya, I. et al. (2006) A basal promoter element recognized by free RNA polymerase  $\sigma$  subunit determines promoter recognition by RNA polymerase holoenzyme. *Mol. Cell* **23**, 97–107 <https://doi.org/10.1016/j.molcel.2006.06.010>
- Haugen, S.P., Berkmen, M.B., Ross, W., Gaal, T., Ward, C. and Gourse, R.L. (2006) rRNA promoter regulation by nonoptimal binding of  $\sigma$  region 1.2: an additional recognition element for RNA polymerase. *Cell* **125**, 1069–1082 <https://doi.org/10.1016/j.cell.2006.04.034>
- Estrem, S.T., Ross, W., Gaal, T., Chen, Z.W., Niu, W., Ebright, R.H. et al. (1999) Bacterial promoter architecture: subsite structure of UP elements and interactions with the carboxy-terminal domain of the RNA polymerase alpha subunit. *Genes Dev.* **13**, 2134–2147 <https://doi.org/10.1101/gad.13.16.2134>
- Browning, D.F. and Busby, S.J.W. (2016) Local and global regulation of transcription initiation in bacteria. *Nat. Rev. Microbiol.* **14**, 638–650 <https://doi.org/10.1038/nrmicro.2016.103>
- Browning, D.F. and Busby, S.J. (2004) The regulation of bacterial transcription initiation. *Nat. Rev. Microbiol.* **2**, 57–65 <https://doi.org/10.1038/nrmicro787>
- Seshasayee, A.S.N., Sivaraman, K. and Luscombe, N.M. (2011) An Overview of Prokaryotic Transcription Factors. In *A Handbook of Transcription Factors* (Hughes, T.R., ed.), pp. 7–23, Springer Netherlands, Dordrecht
- Perez-Rueda, E., Hernandez-Guerrero, R., Martinez-Nuñez, M.A., Armenta-Medina, D., Sanchez, I. and Ibarra, J.A. (2018) Abundance, diversity and domain architecture variability in prokaryotic DNA-binding transcription factors. *PLoS ONE* **13**, e0195332 <https://doi.org/10.1371/journal.pone.0195332>
- Weisberg, R.A. (2004) A genetic switch: phage lambda revisited. Third Edition. By Mark Ptashne. *Q. Rev. Biol.* **79**, 427–428 <https://doi.org/10.1086/428187>
- Ruff, E., Record, M. and Artsimovitch, I. (2015) Initial events in bacterial transcription initiation. *Biomolecules* **5**, 1035–1062 <https://doi.org/10.3390/biom5021035>
- Lee, D.J., Minchin, S.D. and Busby, S.J. (2012) Activating transcription in bacteria. *Annu. Rev. Microbiol.* **66**, 125–152 <https://doi.org/10.1146/annurev-micro-092611-150012>
- Helmann, J.D. (2009) RNA polymerase: a nexus of gene regulation. *Methods (San Diego, Calif)* **47**, 1–5 <https://doi.org/10.1016/j.ymeth.2008.12.001>
- Hanske, J., Sadian, Y. and Müller, C.W. (2018) The cryo-EM resolution revolution and transcription complexes. *Curr. Opin. Struct. Biol.* **52**, 8–15 <https://doi.org/10.1016/j.sbi.2018.07.002>
- Nogales, E. and Scheres, S.H. (2015) Cryo-EM: a unique tool for the visualization of macromolecular complexity. *Mol. Cell* **58**, 677–689 <https://doi.org/10.1016/j.molcel.2015.02.019>
- Nogales, E., Louder, R.K. and He, Y. (2016) Cryo-EM in the study of challenging systems: the human transcription pre-initiation complex. *Curr. Opin. Struct. Biol.* **40**, 120–127 <https://doi.org/10.1016/j.sbi.2016.09.009>
- Benjin, X. and Ling, L. (2020) Developments, applications, and prospects of cryo-electron microscopy. *Protein Sci.* **29**, 872–882 <https://doi.org/10.1002/pro.3805>
- Yang, Y., Liu, C., Zhou, W., Shi, W., Chen, M., Zhang, B. et al. (2021) Structural visualization of transcription activated by a multidrug-sensing MerR family regulator. *Nat. Commun.* **12**, 2702 <https://doi.org/10.1038/s41467-021-22990-8>
- Fang, C., Li, L., Zhao, Y., Wu, X., Philips, S.J., You, L. et al. (2020) The bacterial multidrug resistance regulator BmrR distorts promoter DNA to activate transcription. *Nat. Commun.* **11**, 6284 <https://doi.org/10.1038/s41467-020-20134-y>
- Shi, W., Zhang, B., Jiang, Y., Liu, C., Zhou, W., Chen, M. et al. (2021) Structural basis of copper-efflux-regulator-dependent transcription activation. *iScience* **24**, 102449 <https://doi.org/10.1016/j.isci.2021.102449>
- Fang, C., Philips, S.J., Wu, X., Chen, K., Shi, J., Shen, L. et al. (2021) Cuer activates transcription through a DNA distortion mechanism. *Nat. Chem. Biol.* **17**, 57–64 <https://doi.org/10.1038/s41589-020-00653-x>

- 26 Horne, C.R., Venugopal, H., Panjikar, S., Wood, D.M., Henrickson, A., Brookes, E. et al. (2021) Mechanism of NanR gene repression and allosteric induction of bacterial sialic acid metabolism. *Nat. Commun.* **12**, 1988 <https://doi.org/10.1038/s41467-021-22253-6>
- 27 Bandera, A.M., Bartho, J., Lammens, K., Drexler, D.J., Kleinschwarzer, J., Hopfner, K.P. et al. (2021) Bsr senses bipartite DNA binding motifs by a unique molecular ruler architecture. *Nucleic Acids Res.* **49**, 10166–10177 <https://doi.org/10.1093/nar/gkab736>
- 28 Chen, J., Gopalkrishnan, S., Chiu, C., Chen, A.Y., Campbell, E.A., Gourse, R.L. et al. (2019) *E. coli* TraR allosterically regulates transcription initiation by altering RNA polymerase conformation. *eLife* **8**, e49375 <https://doi.org/10.7554/eLife.49375>
- 29 Zhou, S., Bhukya, H., Malet, N., Harrison, P.J., Rea, D., Belousoff, M.J. et al. (2021) Molecular basis for control of antibiotic production by a bacterial hormone. *Nature* **590**, 463–467 <https://doi.org/10.1038/s41586-021-03195-x>
- 30 Shi, W., Jiang, Y., Deng, Y., Dong, Z. and Liu, B. (2020) Visualization of two architectures in class-II CAP-dependent transcription activation. *PLoS Biol.* **18**, e3000706 <https://doi.org/10.1371/journal.pbio.3000706>
- 31 Liu, B., Hong, C., Huang, R.K., Yu, Z. and Steitz, T.A. (2017) Structural basis of bacterial transcription activation. *Science* **358**, 947–951 <https://doi.org/10.1126/science.aao1923>
- 32 Cartagena, A.J., Banta, A.B., Sathyan, N., Ross, W., Gourse, R.L., Campbell, E.A. et al. (2019) Structural basis for transcription activation by Crl through tethering of  $\sigma$ (S) and RNA polymerase. *Proc. Natl Acad. Sci. U.S.A.* **116**, 18923–7 <https://doi.org/10.1073/pnas.1910827116>
- 33 Shi, J., Li, F., Wen, A., Yu, L., Wang, L., Wang, F. et al. (2021) Structural basis of transcription activation by the global regulator Spx. *Nucleic Acids Res.* **49**, 10756–10769 <https://doi.org/10.1093/nar/gkab790>
- 34 Lilic, M., Darst, S.A. and Campbell, E.A. (2021) Structural basis of transcriptional activation by the *Mycobacterium tuberculosis* intrinsic antibiotic-resistance transcription factor WhiB7. *Mol. Cell* **81**, 2875–2886.e5 <https://doi.org/10.1016/j.molcel.2021.05.017>
- 35 Capodagli, G.C., Tylor, K.M., Kaelber, J.T., Petrou, V.I., Federle, M.J. and Neiditch, M.B. (2020) Structure-function studies of Rgg binding to pheromones and target promoters reveal a model of transcription factor interplay. *Proc. Natl Acad. Sci. U.S.A.* **117**, 24494–24502 <https://doi.org/10.1073/pnas.2008427117>
- 36 Abdelkareem, M., Saint-André, C., Takacs, M., Papai, G., Crucifix, C., Guo, X. et al. (2019) Structural basis of transcription: RNA polymerase backtracking and its reactivation. *Mol. Cell* **75**, 298–309.e4 <https://doi.org/10.1016/j.molcel.2019.04.029>
- 37 Boyaci, H., Chen, J., Jansen, R., Darst, S.A. and Campbell, E.A. (2019) Structures of an RNA polymerase promoter melting intermediate elucidate DNA unwinding. *Nature* **565**, 382–385 <https://doi.org/10.1038/s41586-018-0840-5>
- 38 Lilic, M., Chen, J., Boyaci, H., Braffman, N., Hubin, E.A., Herrmann, J. et al. (2020) The antibiotic sorangicin A inhibits promoter DNA unwinding in a *Mycobacterium tuberculosis* rifampicin-resistant RNA polymerase. *Proc. Natl Acad. Sci. U.S.A.* **117**, 30423–30432 <https://doi.org/10.1073/pnas.2013706117>
- 39 Wang, F., Shi, J., He, D., Tong, B., Zhang, C., Wen, A. et al. (2020) Structural basis for transcription inhibition by *E. coli* SspA. *Nucleic Acids Res.* **48**, 9931–9942 <https://doi.org/10.1093/nar/gkaa672>
- 40 Shin, Y., Qayyum, M.Z., Pupov, D., Eyunina, D., Kulbachinskiy, A. and Murakami, K.S. (2021) Structural basis of ribosomal RNA transcription regulation. *Nat. Commun.* **12**, 528 <https://doi.org/10.1038/s41467-020-20776-y>
- 41 Kang, J.Y., Mooney, R.A., Nedialkov, Y., Saba, J., Mishanina, T.V., Artsimovitch, I. et al. (2018) Structural basis for transcript elongation control by nusG family universal regulators. *Cell* **173**, 1650–1662.e14 <https://doi.org/10.1016/j.cell.2018.05.017>
- 42 Newing, T.P., Oakley, A.J., Miller, M., Dawson, C.J., Brown, S.H.J., Bouwer, J.C. et al. (2020) Molecular basis for RNA polymerase-dependent transcription complex recycling by the helicase-like motor protein HelD. *Nat. Commun.* **11**, 6420 <https://doi.org/10.1038/s41467-020-20157-5>
- 43 Kouba, T., Koval, T., Sudzinová, P., Pospíšil, J., Brezovská, B., Hnilicová, J. et al. (2020) Mycobacterial HelD is a nucleic acids-clearing factor for RNA polymerase. *Nat. Commun.* **11**, 6419 <https://doi.org/10.1038/s41467-020-20158-4>
- 44 Klein, B.J., Bose, D., Baker, K.J., Yusoff, Z.M., Zhang, X. and Murakami, K.S. (2010) RNA polymerase and transcription elongation factor Spt4/5 complex structure. *Proc. Natl Acad. Sci. U.S.A.* **108**, 546–550 <https://doi.org/10.1073/pnas.1013828108>
- 45 Shi, J., Wen, A., Zhao, M., Jin, S., You, L., Shi, Y. et al. (2020) Structural basis of Mfd-dependent transcription termination. *Nucleic Acids Res.* **48**, 11762–11772 <https://doi.org/10.1093/nar/gkaa904>
- 46 Kang, J.Y., Llewellyn, E., Chen, J., Olinares, P.D.B., Brewer, J., Chait, B.T. et al. (2021) Structural basis for transcription complex disruption by the Mfd translocase. *eLife* **10**, e62117 <https://doi.org/10.7554/eLife.62117>
- 47 Glyde, R., Ye, F., Jovanovic, M., Kotta-Loizou, I., Buck, M. and Zhang, X. (2018) Structures of bacterial RNA polymerase complexes reveal the mechanism of DNA loading and transcription initiation. *Mol. Cell* **70**, 1111–1120.e3 <https://doi.org/10.1016/j.molcel.2018.05.021>
- 48 Hobman, J.L. (2007) Merr family transcription activators: similar designs, different specificities. *Mol. Microbiol.* **63**, 1275–1278 <https://doi.org/10.1111/j.1365-2958.2007.05608.x>
- 49 Julian, D.J., Kershaw, C.J., Brown, N.L. and Hobman, J.L. (2009) Transcriptional activation of MerR family promoters in *Cupriavidus metallidurans* CH34. *Antonie Van Leeuwenhoek* **96**, 149–159 <https://doi.org/10.1007/s10482-008-9293-4>
- 50 Heldwein, E.E. and Brennan, R.G. (2001) Crystal structure of the transcription activator BmrR bound to DNA and a drug. *Nature* **409**, 378–382 <https://doi.org/10.1038/35053138>
- 51 Phillips, S.J., Canalizo-Hernandez, M., Yildirim, I., Schatz, G.C., Mondragón, A. and O'Halloran, T.V. (2015) TRANSCRIPTION. Allosteric transcriptional regulation via changes in the overall topology of the core promoter. *Science* **349**, 877–881 <https://doi.org/10.1126/science.aaa9809>
- 52 Schultz, S.C., Shields, G.C. and Steitz, T.A. (1990) Crystallization of *Escherichia coli* catabolite gene activator protein with its DNA binding site. *J. Mol. Biol.* **213**, 159–166 [https://doi.org/10.1016/S0022-2836\(05\)80128-7](https://doi.org/10.1016/S0022-2836(05)80128-7)
- 53 Benoff, B., Yang, H., Lawson, C.L., Parkinson, G., Liu, J., Blatter, E. et al. (2002) Structural basis of transcription activation: the CAP- $\alpha$  CTD-DNA complex. *Science* **297**, 1562–1566 <https://doi.org/10.1126/science.1076376>
- 54 Hubin, E.A., Fay, A., Xu, C., Bean, J.M., Saecker, R.M., Glickman, M.S. et al. (2017) Structure and function of the mycobacterial transcription initiation complex with the essential regulator rbpA. *eLife* **6**, e22520 <https://doi.org/10.7554/eLife.22520>
- 55 Liu, B., Zuo, Y. and Steitz, T.A. (2016) Structures of *E. coli*  $\sigma$ S-transcription initiation complexes provide new insights into polymerase mechanism. *Proc. Natl Acad. Sci. U.S.A.* **113**, 4051–4056 <https://doi.org/10.1073/pnas.1520555113>
- 56 Morris, R.P., Nguyen, L., Gatfield, J., Visconti, K., Nguyen, K., Schnappinger, D. et al. (2005) Ancestral antibiotic resistance in *Mycobacterium tuberculosis*. *Proc. Natl Acad. Sci. U.S.A.* **102**, 12200–12205 <https://doi.org/10.1073/pnas.0505446102>

- 57 Coombes, D., Davies, J.S., Newton-Vesty, M.C., Horne, C.R., Setty, T.G., Subramanian, R. et al. (2020) The basis for non-canonical ROK family function in the N-acetylmannosamine kinase from the pathogen *Staphylococcus aureus*. *J. Biol. Chem.* **295**, 3301–3315 <https://doi.org/10.1074/jbc.RA119.010526>
- 58 North, R.A., Horne, C.R., Davies, J.S., Remus, D.M., Muscroft-Taylor, A.C., Goyal, P. et al. (2018) “Just a spoonful of sugar...”: import of sialic acid across bacterial cell membranes. *Biophys. Rev.* **10**, 219–227 <https://doi.org/10.1007/s12551-017-0343-x>
- 59 Currie, M.J., Manjunath, L., Horne, C.R., Rendle, P.M., Subramanian, R., Friemann, R. et al. (2021) N-Acetylmannosamine-6-phosphate 2-epimerase uses a novel substrate-assisted mechanism to catalyze amino sugar epimerization. *J. Biol. Chem.* **297**, 101113 <https://doi.org/10.1016/j.jbc.2021.101113>
- 60 Horne, C.R., Kind, L., Davies, J.S. and Dobson, R.C.J. (2020) On the structure and function of *Escherichia coli* Yjhc: an oxidoreductase involved in bacterial sialic acid metabolism. *Proteins* **88**, 654–668 <https://doi.org/10.1002/prot.25846>
- 61 de Lencastre, H., Dengler, V., McCallum, N., Kiefer, P., Christen, P., Patrignani, A. et al. (2013) Mutation in the C-Di-AMP cyclase *dacA* affects fitness and resistance of methicillin resistant *Staphylococcus aureus*. *PLoS ONE*. **8**, e73512 <https://doi.org/10.1371/journal.pone.0073512>
- 62 Chen, J., Chiu, C., Gopalkrishnan, S., Chen, A.Y., Olinares, P.D.B., Saecker, R.M. et al. (2020) Stepwise promoter melting by bacterial RNA polymerase. *Mol. Cell* **78**, 275–288.e6 <https://doi.org/10.1016/j.molcel.2020.02.017>
- 63 Lyumkis, D. (2019) Challenges and opportunities in cryo-EM single-particle analysis. *J. Biol. Chem.* **294**, 5181–5197 <https://doi.org/10.1074/jbc.REV118.005602>
- 64 Costa, T.R.D., Ignatiou, A. and Orlova, E.V. (2017) Structural analysis of protein complexes by cryo electron microscopy. *Methods Mol. Biol.* **1615**, 377–413 [https://doi.org/10.1007/978-1-4939-7033-9\\_28](https://doi.org/10.1007/978-1-4939-7033-9_28)
- 65 Nakane, T., Kimanius, D., Lindahl, E. and Scheres, S.H. (2018) Characterisation of molecular motions in cryo-EM single-particle data by multi-body refinement in RELION. *eLife* **7**, e36861 <https://doi.org/10.7554/eLife.36861>
- 66 Punjani, A. and Fleet, D.J. (2021) 3D variability analysis: resolving continuous flexibility and discrete heterogeneity from single particle cryo-EM. *J. Struct. Biol.* **213**, 107702 <https://doi.org/10.1016/j.jsb.2021.107702>
- 67 Zhong, E.D., Bepler, T., Berger, B. and Davis, J.H. (2021) CryoDRGN: reconstruction of heterogeneous cryo-EM structures using neural networks. *Nat. Methods* **18**, 176–185 <https://doi.org/10.1038/s41592-020-01049-4>
- 68 Mostosi, P., Schindelin, H., Kollmannsberger, P. and Thorn, A. (2020) Haruspex: a neural network for the automatic identification of oligonucleotides and protein secondary structure in cryo-electron microscopy maps. *Angew. Chem. Int. Ed. Engl.* **59**, 14788–14795 <https://doi.org/10.1002/anie.202000421>
- 69 Wang, X., Alnabati, E., Aderinwale, T.W., Maddhuri Venkata Subramaniya, S.R., Terashi, G. and Kihara, D. (2021) Detecting protein and DNA/RNA structures in cryo-EM maps of intermediate resolution using deep learning. *Nat. Commun.* **12**, 2302 <https://doi.org/10.1038/s41467-021-22577-3>
- 70 Kim, D.N., Moriarty, N.W., Kirmizialtin, S., Afonine, P.V., Poon, B., Sobolev, O.V. et al. (2019) Cryo\_fit: democratization of flexible fitting for cryo-EM. *J. Struct. Biol.* **208**, 1–6 <https://doi.org/10.1016/j.jsb.2019.05.012>
- 71 Croll, T.I. (2018) ISOLDE: a physically realistic environment for model building into low-resolution electron-density maps. *Acta Crystallogr. D Struct. Biol.* **74**, 519–530 <https://doi.org/10.1107/S2059798318002425>
- 72 Lopéz-Blanco, J.R. and Chacón, P. (2013) iMODFIT: efficient and robust flexible fitting based on vibrational analysis in internal coordinates. *J. Struct. Biol.* **184**, 261–270 <https://doi.org/10.1016/j.jsb.2013.08.010>
- 73 Kidmose, R.T., Juhl, J., Nissen, P., Boesen, T., Karlisen, J.L. and Pedersen, B.P. (2019) Namdinator - automatic molecular dynamics flexible fitting of structural models into cryo-EM and crystallography experimental maps. *IUCrJ*. **6**, 526–531 <https://doi.org/10.1107/S2052252519007619>
- 74 Weissenberger, G., Henderikx, R.J.M. and Peters, P.J. (2021) Understanding the invisible hands of sample preparation for cryo-EM. *Nat. Methods* **18**, 463–471 <https://doi.org/10.1038/s41592-021-01130-6>
- 75 Cheng, Y., Grigorieff, N., Penczek, P.A. and Walz, T. (2015) A primer to single-particle cryo-electron microscopy. *Cell* **161**, 438–449 <https://doi.org/10.1016/j.cell.2015.03.050>
- 76 Stark, H. and Chari, A. (2016) Sample preparation of biological macromolecular assemblies for the determination of high-resolution structures by cryo-electron microscopy. *Microscopy (Oxf)* **65**, 23–34 <https://doi.org/10.1093/jmicro/dfv367>
- 77 Seabrook, S.A. and Newman, J. (2013) High-throughput thermal scanning for protein stability: making a good technique more robust. *ACS Comb. Sci.* **15**, 387–392 <https://doi.org/10.1021/co400013v>
- 78 Chari, A., Haselbach, D., Kirves, J.M., Ohmer, J., Paknia, E., Fischer, N. et al. (2015) Proteoplex: stability optimization of macromolecular complexes by sparse-matrix screening of chemical space. *Nat. Methods* **12**, 859–865 <https://doi.org/10.1038/nmeth.3493>
- 79 Drulyte, I., Johnson, R.M., Hesketh, E.L., Hurdiss, D.L., Scarff, C.A., Porav, S.A. et al. (2018) Approaches to altering particle distributions in cryo-electron microscopy sample preparation. *Acta Crystallogr. D Struct. Biol.* **74**, 560–571 <https://doi.org/10.1107/S2059798318006496>
- 80 Thompson, R.F., Walker, M., Siebert, C.A., Muench, S.P. and Ranson, N.A. (2016) An introduction to sample preparation and imaging by cryo-electron microscopy for structural biology. *Methods* **100**, 3–15 <https://doi.org/10.1016/j.ymeth.2016.02.017>
- 81 Basanta, B., Hirschi, M.M., Grotjahn, D.A. and Lander, G.C. (2021) A case for glycerol as an acceptable additive for single particle cryoEM samples. *bioRxiv* 1–10 <https://doi.org/10.1101/2021.09.10.459874>
- 82 Nwanochie, E. and Uversky, V.N. (2019) Structure determination by single-particle cryo-electron microscopy: only the Sky (and intrinsic disorder) is the limit. *Int. J. Mol. Sci.* **20**, 4186 <https://doi.org/10.3390/ijms20174186>
- 83 Serna, M. (2019) Hands on methods for high resolution cryo-Electron microscopy structures of heterogeneous macromolecular complexes. *Front. Mol. Biosci.* **6**, 33 <https://doi.org/10.3389/fmolb.2019.00033>
- 84 De Wijngaert, B., Sultana, S., Singh, A., Dharia, C., Vanbuel, H., Shen, J. et al. (2021) Cryo-EM structures reveal transcription initiation steps by yeast mitochondrial RNA polymerase. *Mol. Cell* **81**, 268–280.e5 <https://doi.org/10.1016/j.molcel.2020.11.016>
- 85 Kastner, B., Fischer, N., Golas, M.M., Sander, B., Dube, P., Boehringer, D. et al. (2008) Grafix: sample preparation for single-particle electron cryomicroscopy. *Nat. Methods* **5**, 53–55 <https://doi.org/10.1038/nmeth1139>
- 86 Narayanan, A., Vago, F.S., Li, K., Qayyum, M.Z., Yernool, D., Jiang, W. et al. (2018) Cryo-EM structure of *Escherichia coli*  $\sigma$ (70) RNA polymerase and promoter DNA complex revealed a role of  $\sigma$  non-conserved region during the open complex formation. *J. Biol. Chem.* **293**, 7367–7375 <https://doi.org/10.1074/jbc.RA118.002161>

- 87 Stark, H. (2010) Grafix: stabilization of fragile macromolecular complexes for single particle cryo-EM. *Methods Enzymol.* **481**, 109–126 [https://doi.org/10.1016/S0076-6879\(10\)81005-5](https://doi.org/10.1016/S0076-6879(10)81005-5)
- 88 Adamus, K., Le, S.N., Emlund, H., Boudes, M. and Emlund, D. (2019) Agarfix: simple and accessible stabilization of challenging single-particle cryo-EM specimens through crosslinking in a matrix of agar. *J. Struct. Biol.* **207**, 327–331 <https://doi.org/10.1016/j.jsb.2019.07.004>
- 89 Goswami, P., Locke, J. and Costa, A. (2018) Preparing frozen-hydrated protein-Nucleic acid assemblies for high-resolution cryo-EM imaging. *Methods Mol. Biol.* **1814**, 287–296 [https://doi.org/10.1007/978-1-4939-8591-3\\_17](https://doi.org/10.1007/978-1-4939-8591-3_17)
- 90 Noble, A.J., Wei, H., Dandey, V.P., Zhang, Z., Tan, Y.Z., Potter, C.S. et al. (2018) Reducing effects of particle adsorption to the air-water interface in cryo-EM. *Nat. Methods* **15**, 793–795 <https://doi.org/10.1038/s41592-018-0139-3>
- 91 Glaeser, R.M. and Han, B.G. (2017) Opinion: hazards faced by macromolecules when confined to thin aqueous films. *Biophys. Rep.* **3**, 1–7 <https://doi.org/10.1007/s41048-016-0026-3>
- 92 D'Imprima, E., Floris, D., Joppe, M., Sánchez, R., Grininger, M. and Kühlbrandt, W. (2019) Protein denaturation at the air-water interface and how to prevent it. *eLife* **8**, e42747 <https://doi.org/10.7554/eLife.42747>
- 93 Ashtiani, D., Venugopal, H., Belousoff, M., Spicer, B., Mak, J., Neild, A. et al. (2018) Delivery of femtoliter droplets using surface acoustic wave based atomisation for cryo-EM grid preparation. *J. Struct. Biol.* **203**, 94–101 <https://doi.org/10.1016/j.jsb.2018.03.012>
- 94 Dandey, V.P., Wei, H., Zhang, Z., Tan, Y.Z., Acharya, P., Eng, E.T. et al. (2018) Spotiton: new features and applications. *J. Struct. Biol.* **202**, 161–169 <https://doi.org/10.1016/j.jsb.2018.01.002>
- 95 Liu, N., Zhang, J., Chen, Y., Liu, C., Zhang, X., Xu, K. et al. (2019) Bioactive functionalized monolayer graphene for high-resolution cryo-Electron microscopy. *J. Am. Chem. Soc.* **141**, 4016–4025 <https://doi.org/10.1021/jacs.8b13038>
- 96 Wang, F., Liu, Y., Yu, Z., Li, S., Feng, S., Cheng, Y. et al. (2020) General and robust covalently linked graphene oxide affinity grids for high-resolution cryo-EM. *Proc. Natl Acad. Sci. U.S.A.* **117**, 24269–24273 <https://doi.org/10.1073/pnas.2009707117>
- 97 Glaeser, R.M., Han, B.-G., Watson, Z., Ward, F. and Cate, J.H.D. (2018) Streptavidin affinity grids for cryo-EM. *Biophys. J.* **114**, 163a <https://doi.org/10.1016/j.bpj.2017.11.911>
- 98 Tan, Y.Z., Baldwin, P.R., Davis, J.H., Williamson, J.R., Potter, C.S., Carragher, B. et al. (2017) Addressing preferred specimen orientation in single-particle cryo-EM through tilting. *Nat. Methods* **14**, 793–796 <https://doi.org/10.1038/nmeth.4347>
- 99 Russo, C.J. and Passmore, L.A. (2014) Electron microscopy: ultrastable gold substrates for electron cryomicroscopy. *Science* **346**, 1377–1380 <https://doi.org/10.1126/science.1259530>
- 100 Naydenova, K., Peet, M.J. and Russo, C.J. (2019) Multifunctional graphene supports for electron cryomicroscopy. *Proc. Natl Acad. Sci. U.S.A.* **116**, 11718–11724 <https://doi.org/10.1073/pnas.1904766116>
- 101 Chen, J., Noble, A.J., Kang, J.Y. and Darst, S.A. (2019) Eliminating effects of particle adsorption to the air/water interface in single-particle cryo-electron microscopy: bacterial RNA polymerase and CHAPSO. *J. Struct. Biol. X* **1**, 100005 <https://doi.org/10.1016/j.yjsbx.2019.100005>
- 102 Ha, B., Larsen, K.P., Zhang, J., Fu, Z., Montabana, E., Jackson, L.N. et al. (2021) High-resolution view of HIV-1 reverse transcriptase initiation complexes and inhibition by NNRTI drugs. *Nat. Commun.* **12**, 2500 <https://doi.org/10.1038/s41467-021-22628-9>
- 103 Larsen, K.P., Mathiharan, Y.K., Kappel, K., Coey, A.T., Chen, D.H., Barrero, D. et al. (2018) Architecture of an HIV-1 reverse transcriptase initiation complex. *Nature* **557**, 118–122 <https://doi.org/10.1038/s41586-018-0055-9>
- 104 Aksel, T., Yu, Z., Cheng, Y. and Douglas, S.M. (2021) Molecular goniometers for single-particle cryo-electron microscopy of DNA-binding proteins. *Nat. Biotechnol.* **39**, 378–386 <https://doi.org/10.1038/s41587-020-0716-8>
- 105 Scheres, S.H. (2012) RELION: implementation of a Bayesian approach to cryo-EM structure determination. *J. Struct. Biol.* **180**, 519–530 <https://doi.org/10.1016/j.jsb.2012.09.006>
- 106 Punjani, A., Rubinstein, J.L., Fleet, D.J. and Brubaker, M.A. (2017) cryoSPARC: algorithms for rapid unsupervised cryo-EM structure determination. *Nat. Methods* **14**, 290–296 <https://doi.org/10.1038/nmeth.4169>
- 107 Grant, T., Rohou, A. and Grigorieff, N. (2018) cisTEM, user-friendly software for single-particle image processing. *eLife* **7**, e35383 <https://doi.org/10.7554/eLife.35383>
- 108 Nakane, T. and Scheres, S.H.W. (2021) Multi-body refinement of cryo-EM images in RELION. *Methods Mol. Biol.* **2215**, 145–160 [https://doi.org/10.1007/978-1-0716-0966-8\\_7](https://doi.org/10.1007/978-1-0716-0966-8_7)
- 109 Jumper, J., Evans, R., Pritzel, A., Green, T., Figurnov, M., Ronneberger, O. et al. (2021) Highly accurate protein structure prediction with AlphaFold. *Nature* **596**, 583–589 <https://doi.org/10.1038/s41586-021-03819-2>
- 110 Bradley, P., Misura, K.M. and Baker, D. (2005) Toward high-resolution de novo structure prediction for small proteins. *Science* **309**, 1868–1871 <https://doi.org/10.1126/science.1113801>
- 111 Kulik, M., Mori, T. and Sugita, Y. (2021) Multi-scale flexible fitting of proteins to cryo-EM density maps at medium resolution. *Front. Mol. Biosci.* **8**, 631854 <https://doi.org/10.3389/fmolb.2021.631854>
- 112 Trabuco, L.G., Villa, E., Mitra, K., Frank, J. and Schulten, K. (2008) Flexible fitting of atomic structures into electron microscopy maps using molecular dynamics. *Structure* **16**, 673–683 <https://doi.org/10.1016/j.str.2008.03.005>
- 113 Alnabati, E. and Kihara, D. (2020) Advances in structure modeling methods for cryo-electron microscopy maps. *Molecules* **25**, 82 <https://doi.org/10.3390/molecules25010082>
- 114 Wang, R.Y.-R., Kudryashev, M., Li, X., Egelman, E.H., Basler, M., Cheng, Y. et al. (2015) De novo protein structure determination from near-atomic-resolution cryo-EM maps. *Nat. Methods* **12**, 335–338 <https://doi.org/10.1038/nmeth.3287>
- 115 Beckers, M., Mann, D. and Sachse, C. (2021) Structural interpretation of cryo-EM image reconstructions. *Prog. Biophys. Mol. Biol.* **160**, 26–36 <https://doi.org/10.1016/j.pbiomolbio.2020.07.004>
- 116 Rout, M.P. and Sali, A. (2019) Principles for integrative structural biology studies. *Cell* **177**, 1384–1403 <https://doi.org/10.1016/j.cell.2019.05.016>
- 117 Shoemaker, S.C. and Ando, N. (2018) X-rays in the cryo-electron microscopy Era: structural biology's dynamic future. *Biochemistry* **57**, 277–285 <https://doi.org/10.1021/acs.biochem.7b01031>
- 118 Mertens, H.D. and Svergun, D.I. (2010) Structural characterization of proteins and complexes using small-angle X-ray solution scattering. *J. Struct. Biol.* **172**, 128–141 <https://doi.org/10.1016/j.jsb.2010.06.012>

- 119 Gorbet, G.E., Pearson, J.Z., Demeler, A.K., Cölfen, H. and Demeler, B. (2015) Next-Generation AUC: analysis of multiwavelength analytical ultracentrifugation data. *Methods Enzymol.* **562**, 27–47 <https://doi.org/10.1016/bs.mie.2015.04.013>
- 120 Horne, C.R., Henrickson, A., Demeler, B. and Dobson, R.C.J. (2020) Multi-wavelength analytical ultracentrifugation as a tool to characterise protein-DNA interactions in solution. *Eur. Biophys. J.* **49**, 819–827 <https://doi.org/10.1007/s00249-020-01481-6>
- 121 Li, Y., Struwe, W.B. and Kukura, P. (2020) Single molecule mass photometry of nucleic acids. *Nucleic Acids Res.* **48**, e97 <https://doi.org/10.1093/nar/gkaa632>
- 122 Ziegler, S.J., Mallinson, S.J.B., St John, P.C. and Bomble, Y.J. (2021) Advances in integrative structural biology: towards understanding protein complexes in their cellular context. *Comput. Struct. Biotechnol. J.* **19**, 214–225 <https://doi.org/10.1016/j.csbj.2020.11.052>
- 123 Dandey, V.P., Budell, W.C., Wei, H., Bobe, D., Maruthi, K., Kopylov, M. et al. (2020) Time-resolved cryo-EM using spotiton. *Nat. Methods* **17**, 897–900 <https://doi.org/10.1038/s41592-020-0925-6>
- 124 Frank, J. (2017) Time-resolved cryo-electron microscopy: recent progress. *J. Struct. Biol.* **200**, 303–306 <https://doi.org/10.1016/j.jsb.2017.06.005>
